# Supplementary material
Source: PubMed Central journal article supplement (PMC3104811)

## SUPPLEMENTAL MATERIAL

### TABLES

**Table 1.** Primers sequences used in ChIP assays performed on the EP300 gene.

| <b>Primer</b> | <b>Gene region</b> | <b>Sequence</b>       | <b>Position on gene in relation to +1</b> |
|---------------|--------------------|-----------------------|-------------------------------------------|
| Prom L2       | EP300 Promoter     | GAGGAGGTGAGTGTCTCTTG  | -68                                       |
| Prom R2       | EP300 Promoter     | CGCCATCAACCTCTTCCTC   | 32                                        |
| Ex3 L1        | EP300 Exon 3       | AGATGGGAATGATGAACAACC | 33260                                     |
| Ex3 R1        | EP300 Exon 3       | ACTCACCATGTTGGGCATTC  | 33444                                     |
| Ex6 L1        | EP300 Exon 6       | GAGCACCCGTTGGACTTG    | 38798                                     |
| Ex6 R1        | EP300 Exon 6       | GGTTCTTTGCTTGCACCTG   | 38974                                     |
| Ex31 L1       | EP300 Exon 31      | ACCAGGCACTGTGTCTCAAC  | 85235                                     |
| Ex31 R1       | EP300 Exon 31      | AGGGATGGGTTGTGGATTAG  | 85412                                     |
| UTR L2        | EP300 3' UTR       | TTACCACCAGCCTTTCTTCC  | 86570                                     |
| UTR R2        | EP300 3' UTR       | ATGTCAACCATCTGCACCAG  | 86753                                     |
| FL1 L1        | EP300 3' FL1       | GCAGGTACCAGCTAACAGTC  | 87659                                     |
| FL1 R1        | EP300 3' FL1       | GGACTTAGGCAGATATGATCC | 87812                                     |
| FL2 L1        | EP300 3' FL2       | TATGCAAGGAATGCAAGAGGG | 88994                                     |
| FL2 R1        | EP300 3' FL1       | AGCTGCTCCCTAGCAGAATG  | 89160                                     |
|               |                    |                       |                                           |

## FIGURE LEGENDS

**Supplementary figure 1.** Cofilin 1 preferentially occupies gene coding region. ChIP assays. Lysates from cross-linked cells were incubated with the indicated antibodies and coprecipitated DNA was analyzed by PCR with primers amplifying promoter and coding regions of the S19,  $\beta$ -tubulin and GAPDH genes. Non-specific rabbit IgGs were used as negative control. All experiments were reproduced at least in triplicates.

**Supplementary figure 2.** Effect of latrunculin A, cytochalasin D and jasplakinolide on the occupancy of EP300 gene promoter, proximal, distal exons and 3' flanking region by phosphorylated pol II, actin, H3, H3K9ac and cofilin 1. **(A)** ChIP analysis on lysates from crosslinked cells treated with latrunculin A, cytochalasin D or jasplakinolide, incubated with the indicated antibodies. Co-precipitated DNA was analyzed by PCR using primers amplifying promoter, proximal exon 6, distal exon 31 and 3' gene flanking region FL2. Densitometric quantification of relative occupancies determined by ChIP experiments on chromatin isolated from cells treated with **(B)** latrunculin A, **(C)** cytochalasin D or **(D)** jasplakinolide. In all cases the bars diagrams represent average values calculated from analysis of promoter, coding regions (exon 6 and exon 31) and 3' FL2 over five independent experiments. All values are normalized against the signals obtained with an anti-histone H3 antibody.

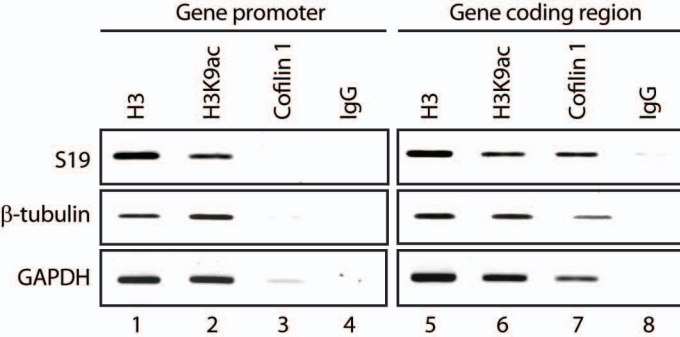

**A**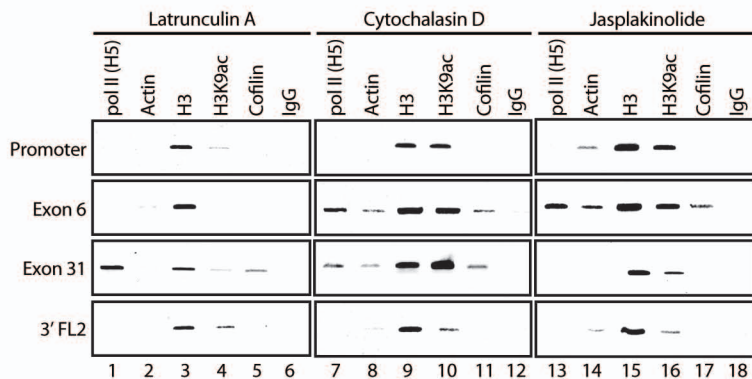**B**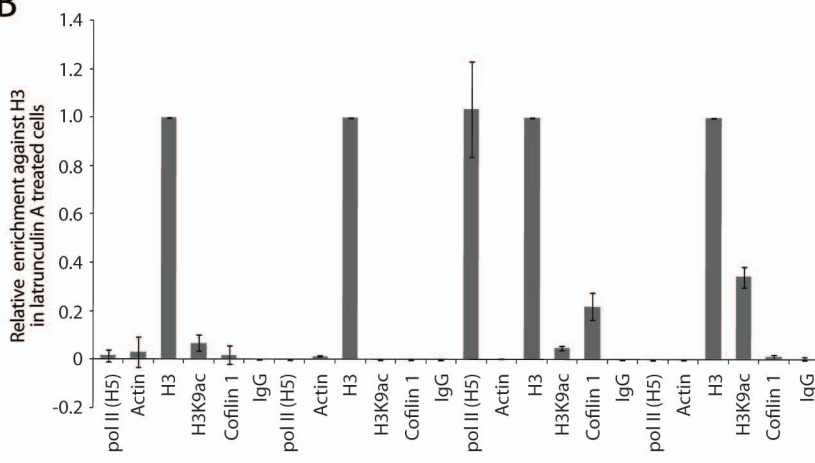**C**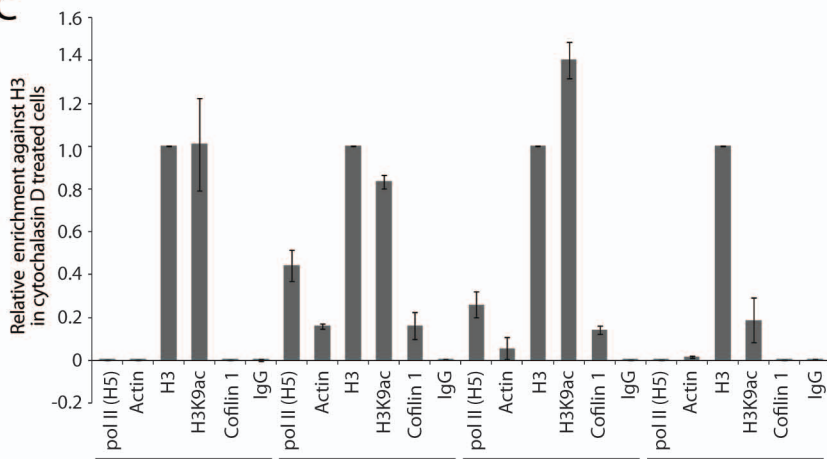**D**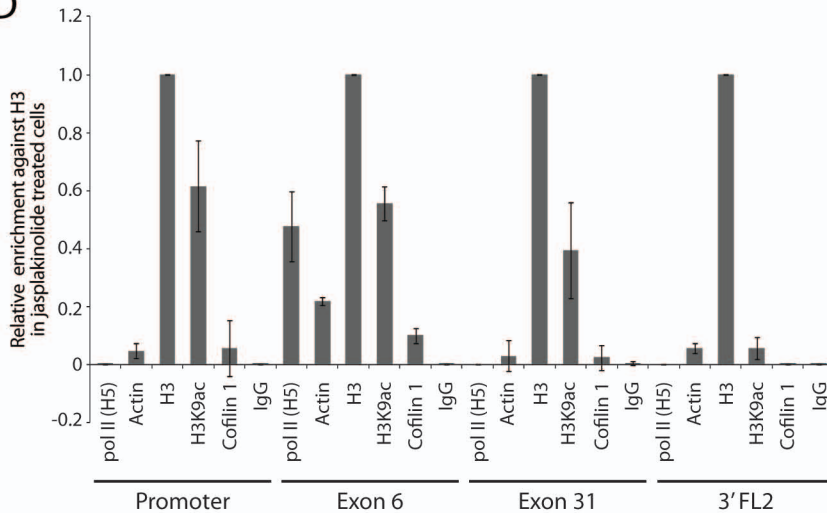

Supplement: nucl0201_0072SD1.pdf [file nucl0201_0072SD1.pdf]
